# Supplementary material for: Staff disability data in UK higher education: Evidence from EDI reports
Source: PubMed Central journal article supplement (PMC11503180; doi:10.1136/medhum-2024-012892), 2024-06-04
Supplement: medhum-50-3-s001.pdf [file medhum-50-3-s001.pdf]

## Supplementary material

**Supplemental Table 1**

Data fields and definitions

| <b>Field name</b> | <b>Description</b>                                                                                                                                                                                                                                          | <b>Categories</b>                                                                                                 |
|-------------------|-------------------------------------------------------------------------------------------------------------------------------------------------------------------------------------------------------------------------------------------------------------|-------------------------------------------------------------------------------------------------------------------|
| Opt-out           | Opted out from returning information about non-academic staff in 2019/20 onwards                                                                                                                                                                            | 0 = No<br>1 = Yes                                                                                                 |
| Region            | Region the institution belongs to (collapsed)                                                                                                                                                                                                               | 1 = North of England<br>2 = Midlands<br>3 = London<br>4 = South of England<br>5 = Northern Ireland/Scotland/Wales |
| Report year       | Year mentioned in the cover of the EDI report. If not mentioned, it was identified on a case-by-case basis from the main text.                                                                                                                              | 1 = Before 2018/19<br>2 = 2018/19<br>3 = 2019/20<br>4 = 2020/21<br>5 = 2021/22                                    |
| Report frequency  | How many EDI reports in each institution are publicly available                                                                                                                                                                                             | 0,...,13                                                                                                          |
| Disability status | This is a derived variable based on the definition/labelling used by each institution. Notes: 'Declared disability' or 'Disabled' coded as Dis. 'Declared non-disabled' or 'No known disability' typically coded as No dis. 'Unknown' typically coded as NK | 1 = Dis only<br>2 = Dis; No dis OR Dis; No dis/NK<br>3 = Dis; No dis; Other                                       |
| Disability type   | Similar to the HESA grouping ( <a href="https://www.hesa.ac.uk/collection/c20025/a/disable">https://www.hesa.ac.uk/collection/c20025/a/disable</a> ) or in a collapsed form                                                                                 | 0 = No<br>1 = Yes                                                                                                 |
| Trends            | If there is any comparison with previous years in the text or graphically or in the tables                                                                                                                                                                  | 0 = No<br>1 = Yes                                                                                                 |

|                               |                                                                                                                                                                                                                                                                                                                                                                                                                      |                                                                 |
|-------------------------------|----------------------------------------------------------------------------------------------------------------------------------------------------------------------------------------------------------------------------------------------------------------------------------------------------------------------------------------------------------------------------------------------------------------------|-----------------------------------------------------------------|
| Trends frequency              | How many years current prevalence rates are being compared with                                                                                                                                                                                                                                                                                                                                                      | 0,...,11                                                        |
| Faculty/service area          | Staff disability by: Faculty/discipline area                                                                                                                                                                                                                                                                                                                                                                         | 0 = No<br>1 = Yes                                               |
| Staff group                   | Staff disability by: Academic, non-academic, professional staff. This can also refer to Teaching & Research, Research only, Teaching only, etc.                                                                                                                                                                                                                                                                      | 0 = No<br>1 = Yes                                               |
| Contract type                 | Staff disability by: Casual, fixed-term, permanent, etc.                                                                                                                                                                                                                                                                                                                                                             | 0 = No<br>1 = Yes                                               |
| Employment mode               | Staff disability by: Full-time, part-time                                                                                                                                                                                                                                                                                                                                                                            | 0 = No<br>1 = Yes                                               |
| Grade                         | Staff disability by: Grade/pay level                                                                                                                                                                                                                                                                                                                                                                                 | 0 = No<br>1 = Yes                                               |
| Russell Group                 | Member of Russell Group                                                                                                                                                                                                                                                                                                                                                                                              | 0 = No<br>1 = Yes                                               |
| Athena SWAN                   | Member of the Athena SWAN Charter ( <a href="https://www.advance-he.ac.uk/equality-charters/athena-swan-charter/members#Members">https://www.advance-he.ac.uk/equality-charters/athena-swan-charter/members#Members</a> – accessed 25 January 2023)                                                                                                                                                                  | 0 = Not a member<br>1 = Bronze<br>2 = Silver<br>3 = Gold        |
| Disability Confident Employer | Member of the Disability Confident Employer Scheme ( <a href="https://assets.publishing.service.gov.uk/government/uploads/system/uploads/attachment_data/file/1127368/disability-confident-list-of-employers.csv/preview">https://assets.publishing.service.gov.uk/government/uploads/system/uploads/attachment_data/file/1127368/disability-confident-list-of-employers.csv/preview</a> – accessed 25 January 2023) | 0 = Not a member<br>1 = Committed<br>2 = Employer<br>3 = Leader |

## Supplemental Table 2

Staff size by region and opt-out option

|                                        | <b>Opted-out†</b> | <b>Not opted-out</b> |
|----------------------------------------|-------------------|----------------------|
| <b>North</b>                           | 1,137 (1,126)     | 2,826 (2,201)        |
| <b>Midlands</b>                        | 1,763 (1,602)     | 2,750 (2,756)        |
| <b>London</b>                          | 562 (378)         | 2,437 (2,436)        |
| <b>South</b>                           | 1,554 (2,696)     | 3,444 (3,162)        |
| <b>Northern Ireland/Scotland/Wales</b> | 1,440 (N/A)       | 2,778 (3,222)        |

*Note.* Means are reported and standard deviations in parentheses. N/A, not available. †Staff size for opt-out reflects academic staff only. For opt-out institutions with approximately 100 academic staff, we set 40% of academic staff as the minimum for non-academic staff, based on the average from non-opt-out institutions.

### Supplemental Figure 1

EDI report availability by opt-out option

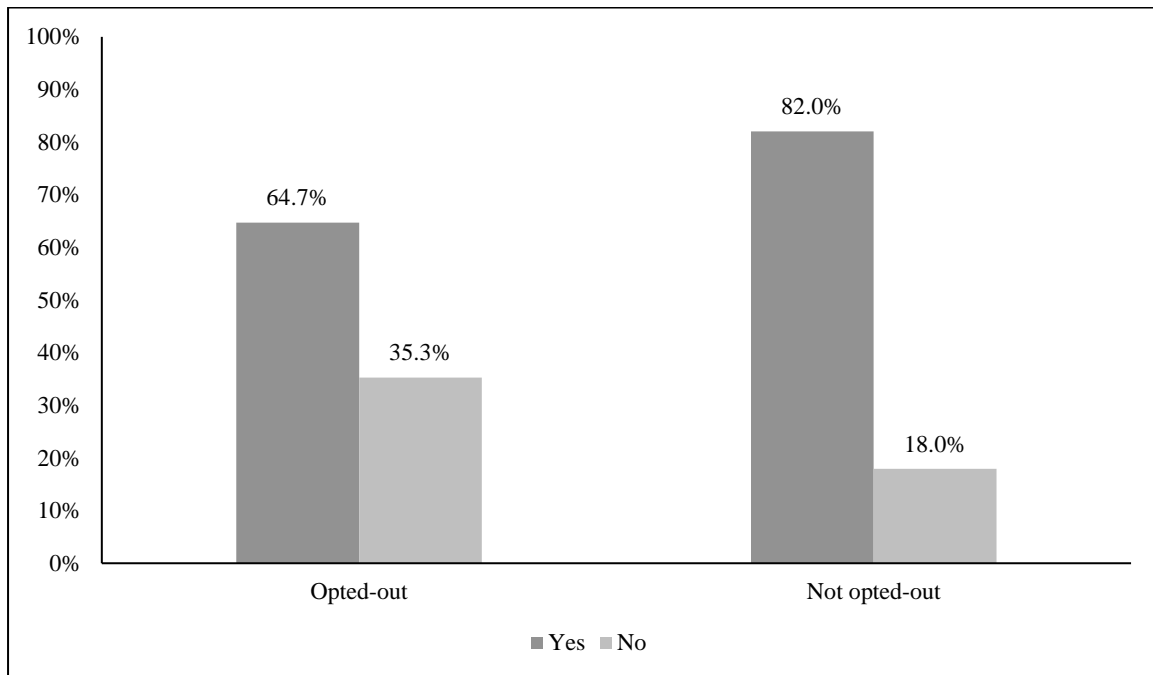

*Note.* The difference between universities that opted-out and those that did not opt-out is statistically significant at 5% level.
